# Supplementary material for: Partnering for Progress: Lessons Learned from a Mental Health Assessment for Youth Living with HIV in India through Community-Based Participatory Research
Source: bioRxiv or medRxiv preprint supplement (doi:10.1101/2024.04.08.24304947), 2024-04-12
Supplement: Supplementary file [file media-1.pdf]

| Session      | Description                                                                    | Activities                                                                                                                                                                                                                                                                                                                                                                                                                                                                                                                                                                                                                                             |
|--------------|--------------------------------------------------------------------------------|--------------------------------------------------------------------------------------------------------------------------------------------------------------------------------------------------------------------------------------------------------------------------------------------------------------------------------------------------------------------------------------------------------------------------------------------------------------------------------------------------------------------------------------------------------------------------------------------------------------------------------------------------------|
| <b>Day 1</b> |                                                                                |                                                                                                                                                                                                                                                                                                                                                                                                                                                                                                                                                                                                                                                        |
| 1            | Introduction and Orientation (45 minutes)                                      | <ul style="list-style-type: none"> <li>Welcome the youth researchers and provide an overview of the training agenda.</li> <li>Explain the purpose of the study and the significance of administering the PHQ-9, GAD-7, and HIV Stigma Scale accurately and sensitively.</li> <li>Discuss the ethical considerations and the importance of confidentiality and informed consent.</li> <li>Provide a detailed explanation of the PHQ-9, GAD-7, and HIV Stigma Scale.</li> <li>Go through each question in the scales, explaining their meaning and how to interpret the responses (e.g., Likert scale - strongly disagree to strongly agree).</li> </ul> |
| 2            | Understanding the Scales (45 minutes)                                          | <ul style="list-style-type: none"> <li>Present examples of relevant studies where these scales were used and how they contributed to the research.</li> <li>Showcase a study that employed the HIV Stigma Scale to measure stigma experienced by people living with HIV in a particular region.</li> <li>Emphasize the importance of cultural sensitivity and understanding.</li> </ul>                                                                                                                                                                                                                                                                |
| <b>Day 2</b> |                                                                                |                                                                                                                                                                                                                                                                                                                                                                                                                                                                                                                                                                                                                                                        |
| 3            | Demonstration (45 minutes)                                                     | <ul style="list-style-type: none"> <li>Facilitators will conduct a demonstration of how to administer the PHQ-9, GAD-7, and HIV Stigma Scale to a mock participant.</li> <li>The demonstration will showcase the correct approach, demonstrating sensitivity and respect towards the participant's feelings and experiences.</li> <li>Researchers will observe the demonstration and take note of the proper techniques and communication skills used during the assessment.</li> </ul>                                                                                                                                                                |
| 4            | Interview Techniques and Communication Skills (30 minutes)                     | <ul style="list-style-type: none"> <li>Train the youth researchers in effective interview techniques, such as active listening, empathy, and non-judgmental attitudes.</li> <li>Teach them how to ask open-ended questions to encourage participants to share their responses more freely.</li> </ul>                                                                                                                                                                                                                                                                                                                                                  |
| 5            | Handling Difficult Situations (20 minutes)                                     | <ul style="list-style-type: none"> <li>Discuss potential challenging scenarios during interviews, such as emotional distress or disclosure of sensitive information.</li> <li>Provide guidance on how to offer support, express empathy, and refer participants to mental health professionals if necessary.</li> </ul>                                                                                                                                                                                                                                                                                                                                |
| 6            | Group Practice and Discussion (45 minutes)                                     | <ul style="list-style-type: none"> <li>Youth researchers engage in hands-on group practice to improve their interview skills in administering the PHQ-9, GAD-7, and HIV Stigma Scale.</li> <li>They are divided into groups of three, taking turns as the interviewer, interviewee (role-playing as a young person living with HIV), and observer.</li> <li>After the practice rounds, researchers discuss their experiences and receive feedback from facilitators to enhance their communication and interview techniques.</li> </ul>                                                                                                                |
| 7            | Data Recording and Documentation (5 minutes)                                   | <ul style="list-style-type: none"> <li>Instruct the youth researchers on proper data recording procedures.</li> <li>Emphasize the importance of accurate and complete data collection to ensure reliable results.</li> </ul>                                                                                                                                                                                                                                                                                                                                                                                                                           |
| 8            | Debriefing, Support, and Role of Youth Researchers and Conclusion (10 minutes) | <ul style="list-style-type: none"> <li>Schedule regular debriefing sessions for the youth researchers to discuss their experiences, share challenges, and seek support.</li> <li>Encourage peer support and collaboration among the researchers.</li> <li>Remind the youth researchers of their essential role as ambassadors of the study and the impact of their work on research outcomes and participant well-being.</li> <li>Provide final instructions and reminders for the data collection process.</li> <li>Conclude the training and express appreciation for their participation.</li> </ul>                                                |
